# Supplementary material for: Pseudomonas and Curtobacterium Strains from Olive Rhizosphere Characterized and Evaluated for Plant Growth Promoting Traits
Source: MDPI journal article supplement (doi:10.3390/plants11172245), 2022-08-29
Supplement: s1 [file s1]

**Dataset S1.** 16S rRNA gene sequences, obtained with primers 27F, 1495R. Genbank accession numbers are displayed

> PK5 (Genbank: ON205586)

```
TGATGTTAGCGGCGGACGGGTGAGTAACACGTGGGTAACCTGCCTGTAAGACTGGGATAAC
TCCGGGAAACCGGGGCTAATACCGGATGCTTGTGTTGAACCGCATGGTTCAAACATAAAAGGT
GGCTTCGGCTACCACTTACAGATGGACCCGCGGCGCATTAGCTAGTTGGTGAGGTAACGGCT
CACCAAGGCAACGATGCGTAGCCGACCTGAGAGGGTGATCGGCCACACTGGGACTGAGACA
CGGCCCAGACTCCTACGGGAGGCAGCAGTAGGGAATCTTCCGCAATGGACGAAAGTCTGAC
GGAGCAACGCCGCGTGAGTGATGAAGGTTTTTCGGATCGTAAAGCTCTGTTGTTAGGGAAGA
ACAAGTACCGTTCGAATAGGGCGGTACCTTGACGGTACCTAACCAGAAAGCCACGGCTAAC
TACGTGCCAGCAGCCGCGGTAATACGTAGGTGGCAAGCGTTGTCCGGAATTATTGGGCGTAA
AGGGCTCGCAGGCGGTTTCCTTAAGTCTGATGTGAAAGCCCCCGGCTCAACCGGGGAGGGTC
ATTGGAACTGGGGAACCTTGAGTGCAGAAGAAGGAGAGTGGAATTCACGTGTAGCGGTGA
AATGCGTAGAGATGTGGAGGAACACCAGTGGGCGAAGGCGACTCTCTGGTCTGTAACCTGAC
GCTGAGGAGCGAAAGCGTGGGGAGCGAACAGGATTAGATACCCTGGTAGTCCACGCCGTAA
ACGATGAGTGCTAAGTGGTTAAGGGGGTTTCCGCCCCCTTAGTGCTGCAGCTAACGCATTAAG
CACTCCGCCTGGGGGAGTACGGTCGCAAGACTGAACTCAAAGGAATTGACGGGGGGCCCGC
ACAAGCGGTGGAGCATGTGGTTTAATTCGAAAGCAACGCGAAGAACCTTACCAGGTCTTGA
CATCCTCTGACAATCCTAGAAGATAGGACGTCCCC
```

>PK6 (Genbank: ON209645)

```
TGCAGTCGAGCGGATGAGAGGAGCTTGCTCCTGGATTTCAGCGGCGGACGGGTGAGTAATGC
CTAGGAATCTGCCTGGTAGTGGGGGACAACGTTTCGAAAGGAACGCTAATACCGCATAACGTC
CTACGGGAGAAAGCAGGGGACCTTCGGGCCTTGCGCTATCAGATGAGCCTAGGTCGGATTA
GCTAGTTGGTGAGGTAATGGCTCACCAAGGCGACGATCCGTAACCTGGTCTGAGAGGATGATC
AGTCACACTGGAAGTGAAGACACGGTCCAGACTCCTACGGGAGGCAGCAGTGGGGAATATTG
GACAATGGGCGAAAGCCTGATCCAGCCATGCCGCGTGTGTGAAGAAGGTCTTCGGATTGTA
AAGCACTTTAAGTTGGGAGGAAGGGCAGTAAATTAATACTTTGCTGTTTTGACGTTACCGAC
AGAATAAGCACCGGCTAACTCTGTGCCAGCAGCCGCGGTAATACAGAGGGTGCAAGCGTTA
ATCGGAATTACTGGGCGTAAAGCGCGCGTAGGTGGTTCGTTAAGTTGAATGTGAAATCCCCG
GGCTCAACCTGGGAACTGCATCCAAAACCTGGCGAGCTAGAGTATGGTAGAGGGTGGTGGAA
TTTCCTGTGTAGCGGTGAAATGCGTAGATATAGGAAGGAACACCAGTGGCGAAGGCGACCA
CCTGGACTGATACTGACACTGAGGTGCGAAAGCGTGGGGAGCAAACAGGATTAGATACCCT
GGTAGTCCACGCCGTAAACGATGTCAACTAGCCGTTGGGAGCCTTGAGCTCTTAGTGCGCA
GCTAACGCATTAAGTTGACCGCCTGGGGAGTACGGCCGCAAGGTTAAACTCAAATGAATT
GACGGGGGGCCCGCACAAGCGGTGGAGCATGTGGTTTAATTCGAAGCAACGCGAAGAACCTT
ACCAGGCCTTGACATCCAATGAACCTTCCAGAGATGGATTGGTGCCTTCGGAACATTGAGA
CAGGTGCTGCATGGCTGTCGTCAGCTCGTGTGTCGTGAGATGTTGGGTAAAGTCCCGTAACGAG
CGCAACCCTTGTCCTTAGTTACCAGCACGTAATGGTGGGCACTCTAAGGAGACTGCCGGTGA
CAAACCGGAGGAAGGTGGGGATGACGTCAAGTCATCATGGCCCTTACGGCCTGGGCTACAC
ACGTGCTACAATGGTTCGGTACAAAGGGTTGCCAAGCCGCGAGGTGGAGCTAATCCCATAAA
ACCGATCGTAGTCCGGATCGCAGTCTGCAACTCGACTGCGTGAAGTCGGAATCGCTAGTAAT
CGTGAATCAGAATGTCACGGTGAATACGTTCCCGGGCCTTGACACACCGCCCGTCACACCA
TGGGAGTGGGTTGCACCAGAAGTAGCTAGTCTAACCTTCGGGAGGACGG
```

> PK11 (Genbank: ON209657)

```
ACGTTAGCGGCGGACGGGTGAGTAACACGTGGGCAACCTGCCTGTAAGACTGGGATAACTT
```

CGGGAAACCGAAGCTAATACCGGATAGGATCTTCTCCTTCATGGGAGATGATTGAAAGATG  
GTTTCGGCTATCACTTACAGATGGGCCCCGGTGCATTAGCTAGTTGGTGAGGTAAACGGCTC  
ACCAAGGCAACGATGCATAGCCGACCTGAGAGGGTGATCGGCCACACTGGGACTGAGACAC  
GGCCCAGACTCCTACGGGAGGCAGCAGTAGGGAATCTTCCGCAATGGACGAAAGTCTGACG  
GAGCAACGCCGCGTGAGTGATGAAGGCTTTCGGGTCGTAAAACCTCTGTTGTTAGGGAAGAA  
CAAGTACGAGAGTAACTGCTCGTACCTTGACGGTACCTAACCAGAAAGCCACGGCTAACTAC  
GTGCCAGCAGCCGCGGTAATACGTAGGTGGCAAGCGTTATCCGGAATTATTGGGCGTAAAG  
CGCGCGCAGGCGGTTTCTTAAGTCTGATGTGAAAGCCCACGGCTCAACCGTGGAGGGTCATT  
GGAAACTGGGGAACCTTGAGTGCAGAAGAGAAAAGCGGAATTCCACGTGTAGCGGTGAAATG  
CGTAGAGATGTGGAGGAACACCAGTGGCGAAGGCGGGCTTTTTGGTCTGTAACCTGACGCTGA  
GGCGCGAAAGCGTGGGGAGCAAACAGGATTAGATACCCTGGTAGTCCACGCCGTAAACGAT  
GAGTGCTAAGTGGTTAGAGGGTTTCCGCCCTTTAGTGCTGCAGCTAACGCATTAAGCACTCC  
GCCTGGGGAGTACGGTCGCAAGACTGAAACTCAAAGGAATTGACGGGGGCCCCGCACAAGCG  
GTGGAGCATGTGGTTTAATTCTGAAGCAACGCGAAGAACCTTACCAGGTCTTGACATCCTCTG  
ACAACCTCTAGAGATAGAGCGTTCCTTCGGGGGGACAGAGTGACAGGTGGTGCATGGTTGT  
CGTCAGCTCGTGTCTGAGATGTTGGGTAAAGTCCCGCAACGAGCGCAACCCTTGATCTTAG  
TTGCCAGCATTTAGTTGGGCACTCTAAGGTGACTGCCGGTGACAAACCGGAGGAAGGTGGG  
GATGACGTCAAATCATCATGCCCCCTTATGACCTGGGCTACACACGTGCTACAATGGATGGTA  
CAAAGGGCTGCAAGACCGCGAGGTCAAGCCAATCCCATAAAACCATTTCTCAGTTCGGATTGT  
AGGCTGCAACTCGCCTACATGAAGCTGGAATCGCTAGTAATCGCGGATCAGCATGCCGCGGT  
GAATACGTTCCCGGGCCTTGTACACACCGCCCGTCACACCACGAGAGTTTGTAACACCCGAA  
GTCGGTGGAGTAACCGTA

> PK14 (Genbank: ON209658)

GAGGTGCTTGACCTCTTTGAGAGCGGCGGACGGGTGAGTAATGCCTAGGAATCTGCCTGGT  
AGTGGGGGATAACGCTCGGAAACGGACGCTAATACCGCATAACGTCCTACGGGAGAAAGCAG  
GGGACCTTCGGGCCTTGCGCTATCAGATGAGCCTAGGTCGGATTAGCTAGTTGGTGAGGTAA  
TGGCTCACCAAGGCGACGATCCGTAACCTGGTCTGAGAGGATGATCAGTCACACTGGAACCTG  
AGACACGGTCCAGACTCCTACGGGAGGCAGCAGTGGGGAATATTGGACAATGGGCGAAAGC  
CTGATCCAGCCATGCCGCGTGTGTGAAGAAGGTCTTCGGATTGTAAAGCACTTTAAGTTGGG  
AGGAAGGGCATTAACCTAATACGTTAGTGTTTTGACGTTACCGACAGAATAAGCACCGGCTA  
ACTCTGTGCCAGCAGCCGCGGTAATACAGAGGGTGCAAGCGTTAATCGGAATTACTGGGCGT  
AAAGCGCGCTAGGTGGTTCGTTAAGTTGGATGTGAAATCCCCGGGGCTCAACCTGGGAACT  
GCATTCAAAACTGTCGAGCTAGAGTATGGTAGAGGGTGGGGGGGAATTTTCTGGGGTAGCG  
GTGAAATGCGTAGATATAGGAAGGAACACCAGTGGCGAAGGCGACCACCTGGACTGATACT  
GACACTGAGGTGCGAAAGCGTGGGGAGCAAACAGGATTAGATACCCTGGTAGTCCACGCCG  
TAAACGATGTCAACTAGCCGTTGGGAGCCTTGAGCTCTTAGTGCGCAGCTAACGCATTAAG  
TTGACCGCCTGGGGGAGTACGGCCGCAAGGTTAGAACTCAAATGAAATTGACGGGGGCCCCG  
CACAAGCGGTGGAGCATGTGGTTTAATTCTGAAGCAACGCGAAGAACCTTACCAGGCCTTGA  
CATCCAATGAACTTTCCAGAAGATGGATTGGTGCCTTCGGGAGCATTGAGACAGGTGCTGCA  
TGGCTGTCGTCAGCTCGTGTCTGAGATGTTTGGGTAAAGTTCCTGTAACGAGCGCAACCCTT  
GTCCTTAGTTACCAGCACGTTATGGTGGGCACTCTAAGGAGACTGCCGGTGACAAACCGGAG  
GAAGGTGGGGATGACGTCAAGTCATCATGGCCCTTACGGCCTGGGCTACACACGTGCTACAA  
TGGTTCGGTACAGAGGGTTGCCAAGCCGCGAGGTGGAGCTAATCCCACAAAACCGATCGTAG  
TCCGGATCGCAGTCTGCAACTCGACTGCGTGAAGTCGGAATCGCTAGTAATCGCGAATCAGA  
ATGTCCGGG

>PK18 (Genbank: ON209660)

CATGCAAGTCGAGCGGTAGAGAGAAGCTTGCTTCTCTTGAGAGCGGCGGACGGGTGAGTAA  
TGCCTAGGAATCTGCCTGGTAGTGGGGGATAACGTTTCGAAACGGACGCTAATACCGCATAC  
GTCCTACGGGAGAAAGCAGGGGACCTTCGGGCCTTGCGCTATCAGATGAGCCTAGGTCGGA  
TTAGCTAGTTGGTGGGGTAATGGCTCACCAAGGCGACGATCCGTAACCTGGTCTGAGAGGATG  
ATCAGTCACACTGGAACCTGAGACACGGTCCAGACTCCTACGGGAGGCAGCAGTGGGGAATA  
TTGGACAATGGGCGAAAGCCTGATCCAGCCATGCCGCGTGTGTGAAGAAGGTCTTCGGATTG  
TAAAGCACTTTAAGTTGGGAGGAAGGGCAGTTACCTAATACGTGATTGTTTTGACGTTACCG  
ACAGAATAAGCACCGGCTAACTCTGTGCCAGCAGCCGCGGTAATACAGAGGGTGCAAGCGT  
TAATCGGAATTACTGGGCGTAAAGCGCGCGTAGGTGGTTTGTAAAGTTGGATGTGAAATCCC  
CGGGCTCAACCTGGGAACCTGCATTCAAACTGACTGACTAGAGTATGGTAGAGGGTGGTGG  
AATTTCTGTGTAGCGGTGAAATGCGTAGATATAGGAAGGAACACCAGTGGCGAAGGCGAC  
CACCTGGACTGATACTGACACTGAGGTGCGAAAGCGTGGGGAGCAAACAGGATTAGATACC  
CTGGTAGTCCACGCCGTAAACGATGTCAACTAGCCGTTGGGAGCCTTGAGCTCTTAGTGCGG  
CAGCTAACGCATTAAGTTGACCGCCTGGGGAGTACGGCCGCAAGGTTAAAACTCAAATGAA  
TTGACGGGGGCCCCGACAAAGCGGTGGAGCATGTGGTTTAATTCGAAGCAACGCGAAGAACC  
TTACCAGGCCCTTGACATCCAATGAACTTTCTAGAGATAGATTGGTGCCTTCGGGAACATTGA  
GACAGGTGCTGCATGGCTGTCGTCAGCTCGTGTCTGTGAGATGTTGGGTAAAGTCCCGTAACG  
AGCGCAACCCCTTGTCCTTAGTTACCAGCACGTAATGGTGGGCACTCTAAGGAGACTGCCGGT  
GACAAACCGGAGGAAGGTGGGGATGACGTCAAGTCATCATGGCCCTTACGGCCTGGGCTAC  
ACACGTGCTACAATGGTTCGGTACAGAGGGTTGCCAAGCCGCGAGGTGGAGCTAATCCCAT  
AAACCGATCGTAGTCCGGATCGCAGTCTGCAACTCGACTGCGTGAAGTCGGAATCGCTAGTA  
ATCGCGAATCAGAATGTCGCGGTGAATACGTTCCCGGGCCTTGACACACCGCCCGTCACAC  
CATGGGAGTGGGTTGCACCAGAAGTAGCTAGTCTAACCTTCGGGAGGACGGT

> PK19 (Genbank: ON209701)

CGAGCGAACTGATTAGAAGCTTGCTTCTATGACGTTAGCGGCGGACGGGTGAGTAACACGTG  
GGCAACCTGCCTGTAAGACTGGGATAACTTCGGGAAACCGAAGCTAATACCGGATAGGATC  
TTCTCCTTCATGGGAGATGATTGAAAGATGGTTTCGGCTATCACTTACAGATGGGCCCCGCG  
TGCATTAGCTAGTTGGTGAAGTAACGGCTCACCAAGGCAACGATGCATAGCCGACCTGAGA  
GGGTGATCGGCCACACTGGGACTGAGACACGGCCCAGACTCCTACGGGAGGCAGCAGTAGG  
GAATCTTCCGCAATGGACGAAAGTCTGACGGAGCAACGCCGCGTGAGTGATGAAGGCTTTC  
GGGTGCTAAAACCTCTGTTGTTAGGGAAGAACAAGTACGAGAGTAACTGCTCGTACCTTGACG  
GTACCTAACCAGAAAGCCACGGCTAACTACGTGCCAGCAGCCGCGGTAATACGTAGGTGGC  
AAGCGTTATCCGGAATTATTGGGCGTAAAGCGCGCGCAGGCGGTTTCTTAAGTCTGATGTGA  
AAGCCACGGCTCAACCGTGGAGGGTCATTGGAAACTGGGGAACCTTGAGTGCAGAAGAGAA  
AAGCGGAATTCCACGTGTAGCGGTGAAATGCGTAGAGATGTGGAGGAACACCAGTGGCGAA  
GGCGGCTTTTTGGTCTGTAACCTGACGCTGAGGCGCGAAAGCGTGGGGAGCAAACAGGATTA  
GATACCCTGGTAGTCCACGCCGTAAACGATGAGTGCTAAGTGTTAGAGGGTTTCCGCCCTTT  
AGTGCTGCAGCTAACGCATTAAGCACTCCGCCTGGGGAGTACGGTCGCAAGACTGAAACTC  
AAAGGAATTGACGGGGGCCCCGACAAAGCGGTGGAGCATGTGGTTTAATTCGAAGCAACGCG  
AAGAACCTTACCAGGTCTTGACATCCTCTGACAACCTCTAGAGATAGAGCGTTCCCTTCGGG  
GGACAGAGTGACAGGTGGTGCATGGTTGTCGTCAGCTCGTGTCTGTGAGATGTTGGGTAAAGT  
CCCGCAACGAGCGCAACCCCTTGATCTTAGTTGCCAGCATTTAGTTGGGCACTCTAAGGTGAC  
TGCCGGTGACAAACCGGAGGAAGGTGGGGATGACGTCAAATCATCATGCCCTTATGACCT  
GGGCTACACACGTGCTACAATGGATGGTACAAAGGGCTGCAAGACCGCGAGGTCAAGCCAA

TCCCATAAAACCATTTCTCAGTTCGGATTGTAGGCTGCAACTCGCCTACATGAAGCTGGAATC  
GCTAGTAATCGCGGATCAGCATGCCGCGGTGAATACGTTCCCG

>PK30 (Genbank: ON209684)

CATGCAGTCGAACGATGATGCCCAGCTTGCTGGGTGGATTAGTGGCGAACGGGTGAGTAAC  
ACGTGAGTAACCTGCCCCTGA CTCTGGGATAAGCGTTGGAAACGACGTCTAATACTGGATAT  
GATCACTGGCCGCATGGTCTGGTGGTGGAAAGATTTTTTGGTTGGGGATGGACTCGCGGCCT  
ATCAGCTTGTTGGTGAGGTAATGGCTCACCAAGGCGACGACGGGTAGCCGGCCTGAGAGGG  
TGACCGGCCACACTGGGACTGAGACACGGCCCAGACTCCTACGGGAGGCAGCAGTGGGGAA  
TATTGCACAATGGGCGAAAGCCTGATGCAGCAACGCCGCGTGAGGGATGACGGCCTTCGGG  
TTGTAAACCTCTTTTAGTAGGGAAGAAGCGAAAGTGACGGTACCTGCAGAAAAAGCACCGG  
CTAACTACGTGCCAGCAGCCGCGGTAAACGTAGGGTGCAAGCGTTGTCCGGAATTATTGGG  
CGTAAAGAGCTCGTAGGCGGTTTGTGCGCTCTGCTGTGAAATCCCGAGGCTCAACCTCGGGC  
TTGCAGTGGGTACGGGCAGACTAGAGTGCGGTAGGGGAGATTGGAATTCCTGGTGTAGCGG  
TGGAATGCGCAGATATCAGGAGGAACACCGATGGCGAAGGCAGATCTCTGGGCCGTAAC TG  
ACGCTGAGGAGCGAAAGCATGGGGAGCGAACAGGATTAGATACCCTGGTAGTCCATGCCGT  
AAACGTTGGGCGCTAGATGTAGGGACCTTTCCACGGTTTCTGTGTCTAGCTAACGCATTAA  
GCGCCCCGCCTGGGGAGTACGGCCGCAAGGCTAAAAC TCAAAGGAATTGACGGGGGGCCCGC  
ACAAGCGGCGGAGCATGCGGATTAATTCGATGCAACGCGAAGAACCTTACCAAGGCTTGAC  
ATACACCGGAAACGGCCAGAGATGGTCGCCCCCTTGTGGTTCGGTGTACAGGTGGTGCATGGT  
TGTCGTCAGCTCGTGTCTGTGAGATGTTGGGTAAAGTCCCGCAACGAGCGCAACCCTCGTTCT  
ATGTTGCCAGCGGGTTATGCCGGGGACTCATAGGAGACTGCCGGGGTCAACTCGGAGGAAG  
GTGGGGATGACGTCAAATCATCATGCCCCTTATGTCTTGGGCTTCACGCATGCTACAATGGC  
CGGTACAAAGGGCTGCGATACCGTAAGGTGGAGCGAATCCCAAAAAGCCGGTCTCAGTTCG  
GATTGAGGTCTGCAACTCGACCTCATGAAGTCGGAGTCGCTAGTAATCGCAGATCAGCAACG  
CTGCGGTGAATACGTTCCCGGGCCTTGTACACACCGCCCGTCAAGTCATGAAAGTCGGTAAC  
ACCCGAAGCCGGTGGCCTAACCT
