# Supplementary material for: Pseudomonas and Curtobacterium Strains from Olive Rhizosphere Characterized and Evaluated for Plant Growth Promoting Traits
Source: MDPI journal article supplement (doi:10.3390/plants11172245), 2022-08-29
Supplement: s1 [file s1]

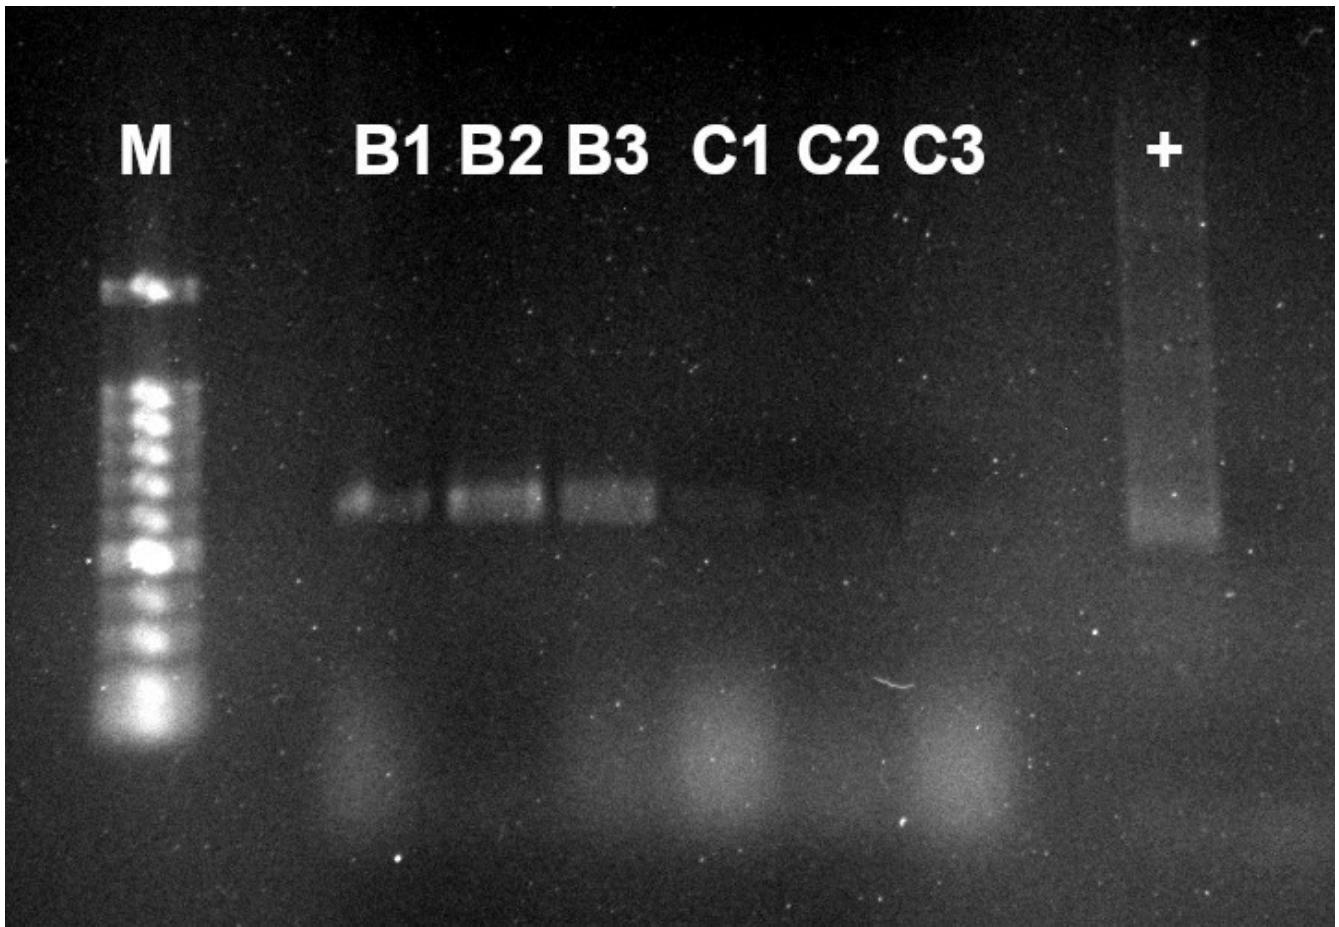

**Figure S1.** 1% agarose gel showing the PCR products amplified from 16S rRNA gene sequences extracted from randomly chosen samples. B1-3: inoculated samples; C1-3: non inoculated samples; M: 100 bp DNA ladder; +: positive control obtained amplifying DNA extracted from axenic PK18 culture. The faint amplicons from samples C1-3 were sequenced and belong to *Pseudomonas* spp. other than the ones used as inoculants, hence we speculate that they come from to endophyte bacteria.
