# Supplementary material for: Pseudomonas and Curtobacterium Strains from Olive Rhizosphere Characterized and Evaluated for Plant Growth Promoting Traits
Source: Plants (Basel). 2022 Aug 29;11(17):2245. doi: 10.3390/plants11172245 (PMC9460707; doi:10.3390/plants11172245)
Supplement: Supplementary file 1 [file plants-11-02245-s001.zip › Table S1.xlsx]

## Sheet: Sheet1
Table S1. Best 5 hits based on the Max Score of 16s rRNA gene sequences obtained with primers 27F, 1495R and compared against NCBI database.
	Scientific Name	Max Score	Total Score	Query Cover	E value	Per. Ident	Acc. Length	Accession
PK5	Bacillus subtilis strain BD18-B23	1720	1720	1	0	0.9927	1107	HF584948.1
	Bacillus subtilis strain MDR12	1718	1718	1	0	0.9927	1122	MK128437.1
	Bacillus subtilis strain CA816	1707	1707	1	0	0.9906	1481	KF040977.1
	Bacillus subtilis strain ASS4B	1707	1707	1	0	0.9906	1397	JQ905096.1
	Bacillus subtilis subsp. subtilis strain A62	1707	1707	1	0	0.9906	1514	JF313215.1
PK6	Pseudomonas sp. PG-2010-28	2579	2579	0.99	0	0.9993	1399	FR746092.1
	Pseudomonas sp. MYb86	2573	2573	0.99	0	0.9986	1402	KX079832.1
	Pseudomonas sp. MYb2	2571	2571	1	0	0.9979	1459	KX079752.1
	Pseudomonas sp. MYb3	2571	2571	1	0	0.9979	1458	KX079749.1
	Pseudomonas hamedanensis	2571	12858	1	0	0.9979	6045338	CP077091.1
PK11	Bacillus sp. Iri 4/2	2519	2519	1	0	0.9985	1405	AB972816.1
	Bacillus aryabhattai strain B8W22T.44	2519	2519	1	0	0.9985	1428	MN543853.1
	Priestia megaterium strain Ni2_2	2519	2519	1	0	0.9985	1454	MH762123.1
	Priestia megaterium strain Mn1-4	2519	2519	1	0	0.9985	5072144	CP031777.1
	Bacillus zanthoxyli strain 1433	2514	2514	1	0	0.9978	1438	NR_164882.1
PK14	Pseudomonas brassicacearum subsp. neoaurantiaca strain CIP 109457	2309	2309	1	0	0.9877	1468	NR116299.1
	Pseudomonas corrugata	2287	2287	1	0	0.9847	1442	NR117826.1
	Pseudomonas kilonensis strain 520-20	2281	2281	1	0	0.9839	1528	NR028929.1
	Pseudomonas corrugata strain Slade 939/1	2279	2279	1	0	0.9839	1454	NR037135.1
	Pseudomonas thivervalensis strain SBK26	2279	2279	1	0	0.9839	1430	NR024951.1
PK18	Pseudomonas sp. strain 3-8	2590	2590	1	0	0.9993	1444	KX378946.1
	Pseudomonas sp. strain 1-24	2590	2590	1	0	0.9993	1443	KX378895.1
	Pseudomonas sp. SAP724.1	2590	2590	1	0	0.9993	1498	JX067675.1
	Pseudomonas cyclaminis	2590	2590	1	0	0.9993	1455	LC582666.1
	Pseudomonas sp. W15Feb38	2590	2590	1	0	0.9993	1505	EU681021.1
PK19	Bacillus sp. Iri 4/2	2519	2519	1	0	0.9985	1405	AB972816.1
	Bacillus aryabhattai strain B8W22T.44	2519	2519	1	0	0.9985	1428	MN543853.1
	Priestia megaterium strain Ni2_2	2519	2519	1	0	0.9985	1454	MH762123.1
	Priestia megaterium strain Mn1-4	2519	2519	1	0	0.9985	5072144	CP031777.1
	Bacillus zanthoxyli strain 1433	2514	2514	1	0	0.9978	1438	NR_164882.1
PK30	Curtobacterium flaccumfaciens strain C-S-R1-2	2542	2542	1	0	1	1397	MK398100.1
	Curtobacterium flaccumfaciens pv. flaccumfaciens	2536	7604	1	0	0.9993	3667996	CP041259.1
	Curtobacterium sp. strain C-S-S2-6	2536	2536	1	0	0.9993	1397	MK398087.1
	Curtobacterium sp. E108	2536	2536	0.99	0	1	1373	KR703506.1
	Curtobacterium flaccumfaciens strain CA83b	2536	2536	1	0	0.9993	1444	KF040989.1
